# Supplementary material for: Hepatocyte Aggregate Formation on Chitin-Based Anisotropic Microstructures of Butterfly Wings
Source: MDPI journal article supplement (doi:10.3390/biomimetics3010002), 2018-01-18
Supplement: s1 [file s1]

# Supplementary Materials: Hepatocyte Aggregate Formation on Chitin-Based Anisotropic Microstructures of Butterfly Wings

Abdelrahman Elbaz <sup>1,2</sup>, Bingbing Gao <sup>1,2</sup>, Zhenzhu He <sup>1,2</sup>, and Zhongze Gu <sup>1,2,3,\*</sup>

<sup>1</sup> State Key Laboratory of Bioelectronics, School of Biological Science and Medical Engineering, Southeast University, Nanjing 210096, China; chem.egy@gmail.com (A.E.); 230139435@seu.edu.cn (B.G.); 230169448@seu.edu.cn (Z.H.)

<sup>2</sup> National Demonstration Center for Experimental Biomedical Engineering Education, Southeast University, Nanjing 210096, China

<sup>3</sup> Laboratory of Environment and Biosafety Research Institute of Southeast University in Suzhou, Suzhou 215123, China

\* Correspondence: gu@seu.edu.cn

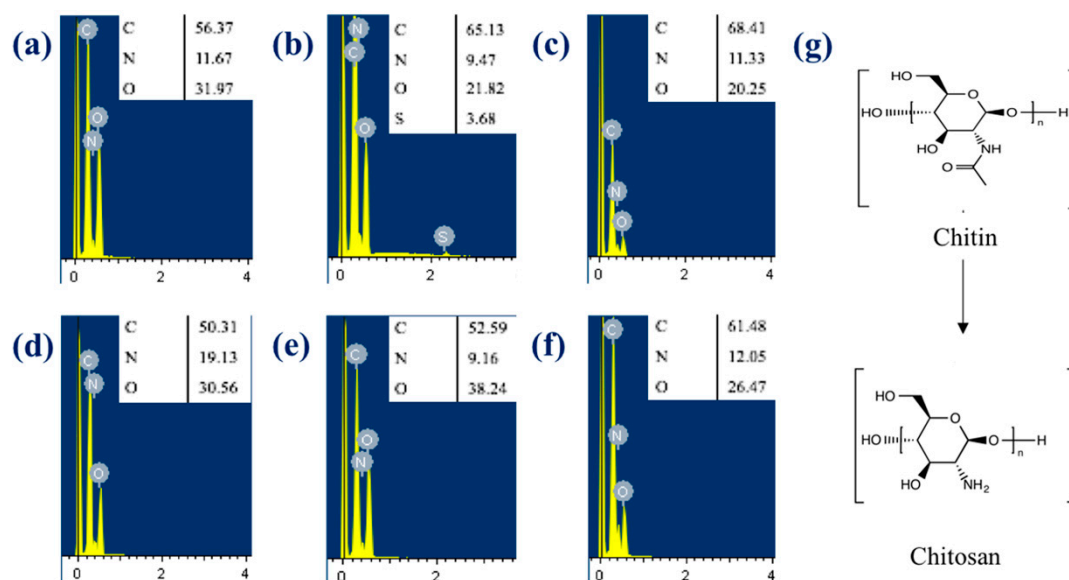

**Figure S1.** Energy-dispersive X-ray spectroscopy analysis of butterfly wings. *M. menelaus*, *P. u. telegonus* and *O. c. lydius* wings (a–c) after hydrophilic treatment and (d–f) after acid/base treatment, from left to right, respectively. (g) Schematic depicting the chemical composition changes on the butterfly wing surface throughout the treatment process.

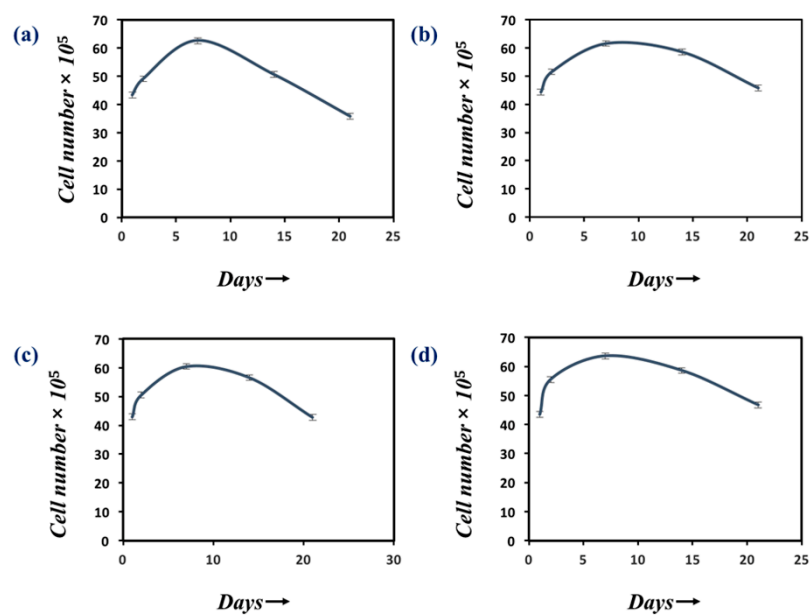

**Figure S2.** Methylthiazolyldiphenyl-tetrazolium bromide assay on HepG2 cells cultured on butterfly wings. (a–d) Number of cells cultured on different substrates: (a) *M. menelaus*, (b) *P. u. telegonus* (fibrous region), (c) *P. u. telegonus* (blue region), and (d) *O. c. lydius* wings.
